# Supplementary material
Source: publisher site journal article supplement (https://www.dovepress.com/get_supplementary_file.php?f=455115.docx)
Supplement: Supplementary file 1 [file get_supplementary_file.php]

Supplemental Materials

Title: External Validation of the International IgA Nephropathy prediction Tool in older adults patients

Authors: Qiuyue Zhang1-5#, Qi Zhang11#, Zhiyu Duan2-5,7, Pu Chen2-5, Jingjing Chen2-5, Mingxv Li8, Jingjie Zhang6, Yanhong Huo9, Wuxing Zhang10, Chen Yang12, Yu Zhang12, Xiangmei Chen2-5* and Guangyan Cai2-5*

Supplemental Table 1. TRIPOD checklist for Prediction Model Development and Validation

Supplemental Table 2. The characteristics of participants in the risk subgroups are based

on the linear predictor of the full model without race.

Supplemental Table 3. The characteristics of participants in the risk subgroups are based

on the linear predictor of the full model with race.

Supplemental Figure 1. Kaplan-Meier curves duration 10-year follow-up.

**Supplemental Table 1: TRIPOD**

| Section/Topic | Item | Checklist Item | Page, Table, Figure |
| --- | --- | --- | --- |
| Title and abstract | | | |
| Title | 1 | Identify the study as developing and/or validating a multivariable prediction model, the target population, and the outcome to be predicted. | Page1 |
| Abstract | 2 | Provide a summary of objectives, study design, setting, participants, sample size, predictors, outcome, statistical analysis, results, and conclusions. | Page2,3 |
| Introduction | | | |
| Background and objectives | 3a | Explain the medical context (including whether diagnostic or prognostic) and rationale for developing or validating the multivariable prediction model, including references to existing models. | Page3,4 |
| 3b | Specify the objectives, including whether the study describes the development or validation of the model or both. | Page4 |
| Methods | | | |
| Source of data | 4a | Describe the study design or source of data (e.g., randomized trial, cohort, or registry data) separately for the development and validation data sets, if applicable. | Page4,5; Figure 1 |
| 4b | Specify the key study dates, including start of accrual, end of accrual, and, if applicable, end of follow-up. | Page4;  Figure 1 |
| Participants | 5a | Specify key elements of the study setting (e.g., primary care, secondary care, general population), including number and location of centers. | Page5:  Figure 1 |
| 5b | Describe eligibility criteria for participants. | Page5;  Figure 1 |
| 5c | Give details of treatments received, if relevant. | Page4 |
| Outcome | 6a | Clearly define the outcome that is predicted by the prediction model, including how and when assessed. | Page4 |
| 6b | Report any actions to blind assessment of the outcome to be predicted. | Page4;5 |
| Predictors | 7a | Clearly define all predictors used in developing or validating the multivariable prediction model, including how and when they were measured. | Page4 |
| 7b | Report any actions to blind assessment of predictors for the outcome and other predictors. | Page4 |
| Sample size | 8 | Explain how the study size was arrived at. | Page4 |
| Missing data | 9 | Describe how missing data were handled (e.g., complete-case analysis, single imputation, multiple imputation) with details of any imputation method. | Page4;  Figure 1 |
| Statistical  analysis  methods | 10c | For validation, describe how the predictions were calculated. | Page5;6 |
| 10d | Specify all measures used to assess model performance and, if relevant, to compare multiple models. | Page5;6 |
| 10e | Describe any model updating (e.g., recalibration) arising from the validation, if done. | N/A |
| Risk groups | 11 | Provide details on how risk groups were created, if done. | Page5;  Table S2,S3 |
| Development  vs. validation | 12 | For validation, identify any differences from the development data in setting, eligibility criteria, outcome, and predictors. | Table 1 |
| Results | | | |
| Participants | 13a | Describe the flow of participants through the study, including the number of participants with and without the outcome and, if applicable, a summary of the follow-up time. A diagram may be helpful. | Page7;Table S2,S3;Figure 1 |
| 13b | Describe the characteristics of the participants (basic demographics, clinical features, available predictors), including the number of participants with missing data for  predictors and outcome. | Page5,7; Table S2, S3 |
| 13c | For validation, show a comparison with the development data of the distribution of important variables (demographics, predictors, and outcome). | Page7; Table 1 |
| Model  performance | 16 | Report performance measures (with CIs) for the prediction model. | Page7,8; Table 2,3 |
| Model-updating | 17 | If done, report the results from any model updating (i.e., model specification, model performance). | N/A |
| Limitations | 18 | Discuss any limitations of the study (such as nonrepresentative sample, few events per predictor, missing data). | Page11,12 |
| Interpretation | 19a | For validation, discuss the results with reference to performance in the development data, and any other validation data. | Page9,10,11 |
| 19b | Give an overall interpretation of the results, considering objectives, limitations, results from similar studies, and other relevant evidence. | Page9,10,11,12 |
| Implications | 20 | Discuss the potential clinical use of the model and implications for future research. | Page11,12 |
| Other information | | | |
| Supplementary  information | 21 | Provide information about the availability of supplementary resources, such as study protocol, Web calculator, and data sets. | Page13 |
| Funding | 22 | Give the source of funding and the role of the funders for the present study. | Page13 |

Abbreviations: D, development; V, validation; S, supplemental material; N/A, not Applicable.

**Supplemental Table 2.** The characteristics of participants in the risk subgroups are based on the linear predictor of the full model with race.

| Characteristic | Low Risk  (n=27) | Intermediate Risk (n=55) | Higher Risk  (n=56) | Highest Risk (n=27) | *P* |
| --- | --- | --- | --- | --- | --- |
| Follow-up, median (IQR), yr | 6.4（3.1-10.1） | 6.8(4.1-9.7) | 3.8(2.1-7.6) | 2.6(1.8-4.9) | <0.001 |
| Age, median (IQR), yr | 63 (62,67) | 64 (61,67) | 65 (62,68) | 64(62,67) | 0.385 |
| Males | 13（48%） | 34(62%) | 34(61%) | 18(67%) | 0.538 |
| eGFR at biopsy, median (IQR), ml/min per 1.73 m2 | 92.51（85-98） | 63(50-76) | 40(33-52) | 26(21-34) | <0.001 |
| Mean arterial pressure at biopsy, median (IQR), mmHg | 97（93-103） | 97(90-104) | 103(97-110) | 103(97-114) | 0.001 |
| Proteinuria at biopsy, median (IQR), g/d | 0.8（0.48-2.1） | 1.2(0.7-2.9) | 2.4(1.4-3.4) | 3.0(2.4-5.1) | <0.001 |
| <0.5 | 7(26%) | 7(13%) | 4(7%) | 0(0%) |  |
| 0.5-1.0 | 9(33%) | 15(27%) | 4(7%) | 1(4%) |  |
| 1.0-2.0 | 3(11%) | 12(22%) | 13(23%) | 3(11%) |  |
| 2.0-3.0 | 2(7%) | 7(13%) | 15(27%) | 9(33%) |  |
| >3.0 | 6(22%) | 14(25%) | 20(36%) | 14(52%) |  |
| MEST-C histologic score |  |  |  |  |  |
| M1 | 6(22%) | 27(48%) | 27(48%) | 22(82%) | <0.001 |
| E1 | 3(11%) | 13(24%) | 10(18%) | 4(15%) | 0.529 |
| S1 | 8(30%) | 31(56%) | 33(59%) | 19(70%) | 0.019 |
| T1 | 3(11%) | 21(38%) | 34(61%) | 8(30%) | <0.001 |
| T2 | 0(0%) | 1(2%) | 12(21%) | 19(70%) | <0.001 |
| C1 | 4(15%) | 14(25%) | 19(34%) | 7(26%) | 0.321 |
| C2 | 0(0%) | 0(0%) | 3(5%) | 5(19%) | 0.218 |
| RAAS blocker use at or prior to biopsy | 7(26%) | 19(35%) | 32(57%) | 15(56%) | 0.012 |
| Immunosuppression use at or prior to biopsy | 1(4%) | 0(0%) | 2(4%) | 1(4%) | 0.043 |
| Primary outcome |  |  |  |  |  |
| 50% decline in eGFR | 2(7%) | 8(15%) | 6(11%) | 9(33%) | 0.028 |
| Kidney failure | 1(4%) | 9(16%) | 6(11%) | 9(33%) | 0.014 |
| Total primary outcome | 2(7%) | 10(18%) | 11(20%) | 12(44%) | 0.007 |

Notes: Risk groups were based on percentiles of the linear predictor (low risk: <16th, intermediate risk: 16th-50th, higher risk: 50th-84th, highest risk: >84th). The primary outcome was a combined event that included either a permanent >50% reduction in eGFR or kidney failure (eGFR <15 ml/min/1.73 m2 or kidney replacement therapy), whichever occurred first. Abbreviations: IQR, interquartile range; eGFR, estimated glomerular filtration rate; MEST, mesangial (M), endocapillary (E) hypercellularity, segmental sclerosis (S), and interstitial fibrosis/tubular atrophy (T); RAAS, renin-angiotensin-aldosterone system blocker.

**Supplemental Table 3.** The characteristics of participants in the risk subgroups are based on the linear predictor of the full model without race.

| Characteristic | Low Risk  (n=27) | Intermediate Risk (n=55) | Higher Risk  (n=56) | Highest Risk  (n=27) | *P* |
| --- | --- | --- | --- | --- | --- |
| Follow-up, median (IQR), yr | 6.0（3.0-9.6） | 7.7(4.2-10.4) | 3.8(2.2-7.5) | 2.6(1.8-4.9) | <0.001 |
| Age, median (IQR), yr | 63 (61,67) | 64 (62,67) | 64 (62,67) | 64(61,67) | 0.909 |
| Males | 14（52%） | 33(60%) | 33(59%) | 19(70%) | 0.576 |
| eGFR at biopsy, median (IQR), ml/min per 1.73 m2 | 92（85-98） | 60(46-75) | 45(35-56) | 26(21-31) | <0.001 |
| Mean arterial pressure at biopsy, median IQR), mmHg | 97（93-103） | 97(91-105) | 104(97-110) | 103(97-114) | 0.001 |
| Proteinuria at biopsy, median (IQR), g/d | 1.1（0.7-2.4） | 1.1(0.7-3.0) | 2.4(1.4-3.4) | 3.0(2.3-5.1) | <0.001 |
| <0.5 | 5(19%) | 7(13%) | 6(11%) | 0(0%) |  |
| 0.5-1.0 | 7(26%) | 14(25%) | 6(11%) | 2(7%) |  |
| 1.0-2.0 | 5(19%) | 11(20%) | 12(21%) | 4(15%) |  |
| 2.0-3.0 | 3(11%) | 9(16%) | 13(21%) | 9(33%) |  |
| >3.0 | 6(22%) | 15(27%) | 21(38%) | 11(41%) |  |
| MEST-C histologic score |  |  |  |  |  |
| M1 | 5(19%) | 27(49%) | 27(48%) | 23(85%) | <0.001 |
| E1 | 2(7%) | 13(24%) | 11(20%) | 4(15%) | 0.322 |
| S1 | 9(33%) | 30(54%) | 34(61%) | 18(67%) | 0.061 |
| T1 | 0(0%) | 21(38%) | 37(66%) | 8(30%) | <0.001 |
| T2 | 0(0%) | 0(0%) | 13(23%) | 19(70%) | <0.001 |
| C1 | 3(11%) | 14(25%) | 19(34%) | 8(30%) | 0.171 |
| C2 | 0(0%) | 0(0%) | 3(5%) | 5(19%) | 0.218 |
| RAAS blocker use at or prior to biopsy | 10(37%) | 18(33%) | 31(55%) | 14(52 %) | 0.073 |
| Immunosuppression use at or prior to biopsy | 1(4%) | 0(0%) | 2(4%) | 1(4%) | 0.443 |
| Primary outcome |  |  |  |  |  |
| 50% decline in eGFR | 1(4%) | 9(16%) | 6(11%) | 9(33%) | 0.014 |
| Kidney failure | 0(0%) | 4(7%) | 7(13%) | 11(41%) | ＜0.001 |
| Total primary outcome | 1(4%) | 11(20%) | 11(20%) | 12(40%) | 0.003 |

Notes: Risk groups were based on percentiles of the linear predictor (low risk: <16th, intermediate risk: 16th-50th, higher risk: 50th-84th, highest risk: >84th). The primary outcome was a combined event that included either a permanent >50% reduction in eGFR or kidney failure (eGFR <15 ml/min/1.73 m2 or kidney replacement therapy), whichever occurred first. Abbreviations: IQR, interquartile range; eGFR, estimated glomerular filtration rate; MEST, mesangial (M), endocapillary (E) hypercellularity, segmental sclerosis (S), and interstitial fibrosis/tubular atrophy (T); RAAS, renin-angiotensin-aldosterone system blocker


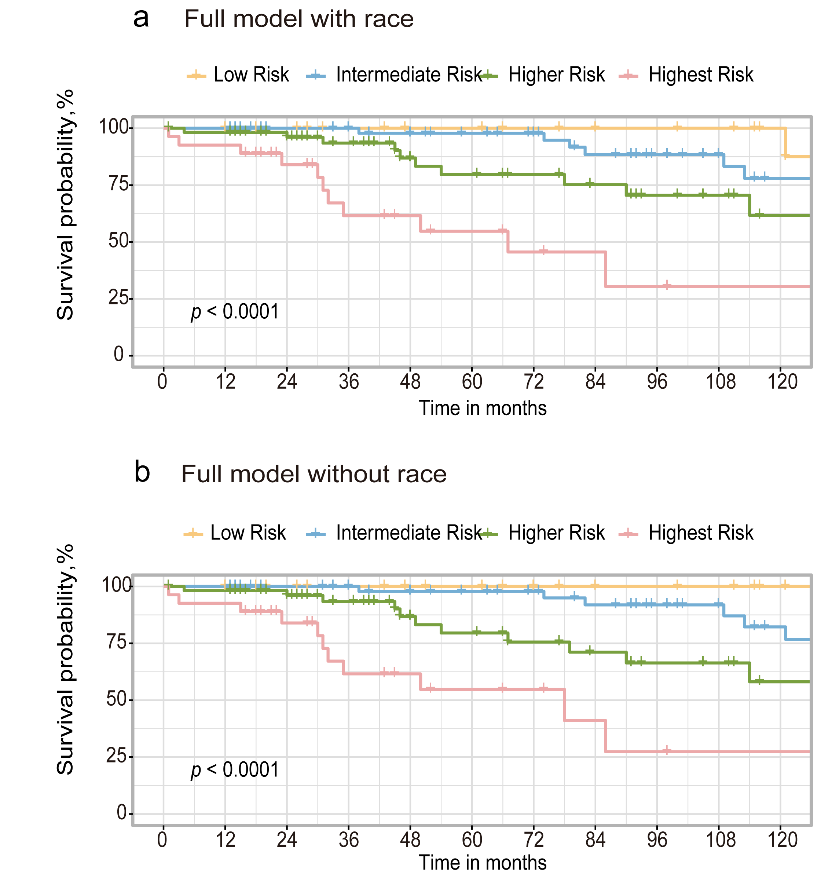


**Supplemental Figure 1**: Kaplan-Meier curves duration 10-year follow-up.

(a) and (b) respectively show the Kaplan-Meier curves of primary outcome in 4 risk groups distinguished by the Full model with race and Full model without race. After a follow-up period of up to 10 years, the well-separated survival curves of the different risk groups, particularly the low and intermediate risk groups, demonstrate the good discriminative ability of both models The groups were defined as <16th (low risk), 16th - 50th (intermediate risk), 50th - 84th (higher risk), and >84th (the highest risk) percentiles of the linear predictor from the full model without and with race, respectively.
